# Supplementary material for: Single-Nucleotide Polymorphisms in LEP and LEPR Associated With Breast Cancer Risk: Results From a Multicenter Case–Control Study in Chinese Females
Source: Front Oncol. 2022 Feb 10;12:809570. doi: 10.3389/fonc.2022.809570 (PMC8866686; doi:10.3389/fonc.2022.809570)
Supplement: Supplementary file 3 [file Table_3.xlsx]

## Sheet: Sheet1
Supplementary Table 3. The association of LEP/LEPR genetic variations with breast cancer risk according to BMI and WHR category
Genotypes	BMI								WHR
	≤ 24 kg/m2				> 24 kg/m2				< 0.85				≥ 0.85
	Control, n (%)	Case, n (%)	OR (95%CI)*	P- value	Control, n (%)	Case, n (%)	OR (95%CI)*	P- value	Control, n (%)	Case, n (%)	OR (95%CI)*	P- value	Control, n (%)	Case, n (%)	OR (95%CI)*	P- value
LEP rs10244329
Co-dominant
AA	266 (58.1)	242 (57.3)	1 (ref.)		254 (55.6)	262 (54.9)	1 (ref.)		265 (56.3)	229 (55.6)	1 (ref.)		211 (57.0)	204 (55.0)	1 (ref.)
TA	161 (35.2)	157 (37.2)	1.060 (0.793-1.416)	0.694	175 (38.3)	196 (41.1)	1.031 (0.785-1.354)	0.827	176 (37.4)	167 (40.5)	1.102 (0.831-1.461)	0.499	133 (35.9)	145 (39.1)	1.057 (0.776-1.441)	0.725
TT	31 (6.8)	23 (5.5)	0.904 (0.503-1.622)	0.734	28 (6.1)	19 (4.0)	0.705 (0.378-1.314)	0.271	30 (6.4)	16 (3.9)	0.664 (0.349-1.262)	0.211	26 (7.0)	22 (5.9)	0.987 (0.528-1.846)	0.967
Dominant
AA	266 (58.1)	242 (57.3)	1 (ref.)		254 (55.6)	262 (54.9)	1 (ref.)		265 (56.3)	229 (55.6)	1 (ref.)		211 (57.0)	204 (55.0)	1 (ref.)
TA+TT	192 (41.9)	180 (42.7)	1.036 (0.786-1.366)	0.803	203 (44.4)	215 (45.1)	0.989 (0.760-1.288)	0.936	206 (43.7)	183 (44.4)	1.040 (0.792-1.366)	0.778	159 (43.0)	167 (45.0)	1.047 (0.778-1.408)	0.761
Recessive
TA+AA	427 (93.2)	399 (94.5)	1 (ref.)		429 (93.9)	458 (96.0)	1 (ref.)		441 (93.6)	396 (96.1)	1 (ref.)		344 (93.0)	349 (94.1)	1 (ref.)
TT	31 (6.8)	23 (5.5)	0.884 (0.498-1.570)	0.674	28 (6.1)	19 (4.0)	0.696 (0.377-1.284)	0.246	30 (6.4)	16 (3.9)	0.638 (0.339-1.199)	0.163	26 (7.0)	22 (5.9)	0.965 (0.522-1.782)	0.909
LEP rs10954173
Co-dominant
GG	303 (64.6)	277 (64.1)	1 (ref.)		291 (62.9)	298 (61.6)	1 (ref.)		310 (64.0)	261 (62.1)	1 (ref.)		238 (63.8)	238 (62.8)	1 (ref.)
GA	143 (30.5)	140 (32.4)	1.092 (0.814-1.464)	0.559	155 (33.5)	171 (35.3)	1.033 (0.783-1.361)	0.82	152 (31.4)	147 (35.0)	1.183 (0.888-1.576)	0.25	120 (32.2)	127 (33.5)	1.010 (0.738-1.383)	0.95
AA	23 (4.9)	15 (3.5)	0.803 (0.403-1.600)	0.533	17 (3.7)	15 (3.1)	0.879 (0.426-1.814)	0.727	22 (4.5)	12 (2.9)	0.680 (0.327-1.413)	0.301	15 (4.0)	14 (3.7)	1.067 (0.489-2.327)	0.87
Dominant
GG	303 (64.6)	277 (64.1)	1 (ref.)		291 (62.9)	298 (61.6)	1 (ref.)		310 (64.0)	261 (62.1)	1 (ref.)		238 (63.8)	238 (62.8)	1 (ref.)
GA+AA	166 (35.4)	155 (35.9)	1.053 (0.794-1.396)	0.72	172(37.1)	186 (38.4)	1.018 (0.778-1.331)	0.897	174 (36.0)	159 (37.9)	1.119 (0.849-1.476)	0.424	135 (36.2)	141 (37.2)	1.016 (0.750-1.376)	0.92
Recessive
GA+GG	446 (95.1)	417 (96.5)	1 (ref.)		446 (96.3)	469 (96.9）	1 (ref.)		462 (95.5)	408 (97.1)	1 (ref.)		358 (96.0)	365 (96.3)	1 (ref.)
AA	23 (4.9)	15 (3.5)	0.781 (0.395-1.545)	0.477	17 (3.7)	15 (3.1)	0.869 (0.424-1.781)	0.701	22 (4.5)	12 (2.9)	0.641 (0.311-1.324)	0.23	15 (4.0)	14 (3.7)	1.064 (0.491-2.302)	0.876
LEP rs2167270
Co-dominant
GG	307 (65.6)	280 (64.8)	1 (ref.)		292 (62.8)	304 (62.8)	1 (ref.)		314 (64.9)	262 (62.4)	1 (ref.)		239 (63.9)	245 (64.6)	1 (ref.)
GA	141 (30.1)	136 (31.5)	1.090 (0.811-1.464)	0.568	158 (34.0)	166 (34.3)	0.965 (0.732-1.272)	0.799	152 (31.4)	144 (34.3)	1.173 (0.880-1.563)	0.276	121 (32.4)	121 (31.9)	0.932 (0.680-1.277)	0.661
AA	20 (4.3)	16 (3.7)	1.044 (0.519-2.098)	0.904	15 (3.2)	14 (2.9)	0.922 (0.432-1.970)	0.834	18 (3.7)	14 (3.3)	1.018 (0.492-2.108)	0.961	14 (3.7)	13 (3.4)	1.037 (0.462-2.329)	0.929
Dominant
GG	307 (65.6)	280 (64.8)	1 (ref.)		292 (62.8)	304 (62.8)	1 (ref.)		314 (64.9)	262 (62.4)	1 (ref.)		239 (63.9)	245 (64.6)	1 (ref.)
GA+AA	161 (34.4)	152 (35.2)	1.084 (0.817-1.440)	0.575	173 (37.2)	180 (37.2)	0.961 (0.735-1.258)	0.773	170 (35.1)	158 (37.6)	1.157 (0.876-1.527)	0.303	135 (36.1)	134 (35.4)	0.942 (0.694-1.277)	0.699
Recessive
GA+GG	448 (95.7)	416 (96.3)	1 (ref.)		450 (96.8)	470 (97.1)	1 (ref.)		466 (96.3)	406 (96.7)	1 (ref.)		360 (96.3)	366 (96.6)	1 (ref.)
AA	20 (4.3)	16 (3.7)	1.016 (0.509-2.029)	0.964	15 (3.2)	14 (2.9)	0.934 (0.440-1.983)	0.859	18 (3.7)	14 (3.3)	0.964 (0.469-1.983)	0.921	14 (3.7)	13 (3.4)	1.062 (0.476-2.367)	0.883
LEP rs3828942
Co-dominant
AA	276 (59.1)	250 (57.9)	1 (ref.)		259 (55.8)	266 (55.0)	1 (ref.)		275 (56.9)	234 (55.7)	1 (ref.)		216 (57.9)	209 (55.1)	1 (ref.)
AG	160 (34.3)	159 (36.8)	1.096 (0.822-1.461)	0.534	177 (38.1)	198 (40.9)	1.038 (0.792-1.360)	0.788	178 (36.9)	169 (40.2)	1.127 (0.852-1.490)	0.401	131 (35.1)	148 (39.1)	1.098 (0.807-1.494)	0.551
GG	31 (6.6)	23 (5.3)	0.911 (0.508-1.635)	0.756	28 (6.0)	20 (4.1)	0.747 (0.404-1.380)	0.351	30 (6.2)	17 (4.0)	0.720 (0.383-1.351)	0.306	26 (7.0)	22 (5.8)	0.986 (0.528-1.843)	0.966
Dominant
AA	276 (59.1)	250 (57.9)	1 (ref.)		259 (55.8)	266 (55.0)	1 (ref.)		275 (56.9)	234 (55.7)	1 (ref.)		216 (57.9)	209 (55.1)	1 (ref.)
AG+GG	191 (40.9)	182 (42.1)	1.067 (0.811-1.404)	0.644	205 (44.2)	218 (45.0)	1.010 (0.771-1.300)	0.994	208 (43.1)	186 (44.3)	1.070 (0.817-1.401)	0.623	157 (42.1)	170 (44.9)	1.082 (0.806-1.453)	0.6
Recessive
AG+AA	436 (93.4)	409 (94.7)	1 (ref.)		436 (94.0)	464 (95.9)	1 (ref.)		453 (93.8)	403 (96.0)	1 (ref.)		347 (93.0)	357 (94.2)	1 (ref.)
GG	31 (6.6)	23 (5.3)	0.881 (0.496-1.565)	0.666	28 (6.0)	20 (4.1)	0.735 (0.402-1.344)	0.318	30 (6.2)	17 (4.0)	0.685 (0.369-1.274)	0.232	26 (7.0)	22 (5.8)	0.950 (0.515-1.754)	0.87
LEP rs4731426
Co-dominant
CC	284 (60.9)	252 (58.3)	1 (ref.)		261 (56.1)	275 (56.8)	1 (ref.)		281 (58.2)	237 (56.4)	1 (ref.)		219 (58.7)	216 (57.0)	1 (ref.)
GC	155 (33.3)	159 (36.8)	1.158 (0.868-1.544)	0.318	177 (38.1)	191 (39.5)	0.974 (0.743-1.277)	0.849	176 (36.4)	166 (39.5)	1.135 (0.858-1.501)	0.374	129 (34.6)	144 (38.0)	1.065 (0.782-1.449)	0.689
GG	27 (5.8)	21 (4.9)	1.021 (0.552-1.889)	0.947	27 (5.8)	18 (3.7)	0.682 (0.361-1.289)	0.239	26 (5.4)	17 (4.0)	0.866 (0.454-1.654)	0.663	25 (6.7)	19 (5.0)	0.870 (0.453-1.671)	0.675
Dominant
CC	284 (60.9)	252 (58.3)	1 (ref.)		261 (56.1)	275 (56.8)	1 (ref.)		281 (58.2)	237 (56.4)	1 (ref.)		219 (58.7)	216 (57.0)	1 (ref.)
GC+GG	182 (39.1)	180 (41.7)	1.139 (0.865-1.500)	0.355	204 (43.9)	209 (43.2)	0.939 (0.722-1.220)	0.635	202 (41.8)	183 (43.6)	1.102 (0.841-1.444)	0.482	154 (41.3)	163 (43.0)	1.037 (0.772-1.394)	0.808
Recessive
GC+CC	439 (94.2)	411 (95.1)	1 (ref.)		438 (94.2)	466 (96.3)	1 (ref.)		457 (94.6)	403 (96.0)	1 (ref.)		348 (93.3)	360 (95.0)	1 (ref.)
GG	27 (5.8)	21 (4.9)	0.968 (0.528-1.775)	0.916	27 (5.8)	18 (3.7)	0.690 (0.369-1.290)	0.245	26 (5.4)	17 (4.0)	0.824 (0.436-1.557)	0.55	25 (6.7)	19 (5.0)	0.849 (0.447-1.613)	0.616
Abbreviations: CI, Confidence Interval; OR, Odds Ratio; ref., reference.
*Adjusted for menstrual status and family history of breast cancer.
